# Supplementary material
Source: publisher figshare collection journal article supplement (https://acs.figshare.com/ndownloader/files/23567808)
Supplement: Supplementary file 1 [file 23567808]

# Unexpected plasticization effects on the structure and properties of polyelectrolyte complexed chitosan/alginate materials

*Pei Chen<sup>a,b</sup>, Fengwei Xie<sup>b,c,\*†</sup>, Fengzai Tang<sup>d</sup>, Tony McNally<sup>b,\*\*</sup>*

<sup>a</sup> College of Food Science, South China Agricultural University, Guangzhou, Guangdong 510642, China

<sup>b</sup> International Institute for Nanocomposites Manufacturing (IINM), WMG, University of Warwick, Coventry CV4 7AL, United Kingdom

<sup>c</sup> School of Chemical Engineering, The University of Queensland, Brisbane, Qld 4072, Australia

<sup>d</sup> WMG, University of Warwick, Coventry CV4 7AL, United Kingdom

\* Fengwei Xie. Email: [d.xie.2@warwick.ac.uk](mailto:d.xie.2@warwick.ac.uk), [fwhsieh@gmail.com](mailto:fwhsieh@gmail.com)

\*\* Tony McNally. Email: [t.mcnally@warwick.ac.uk](mailto:t.mcnally@warwick.ac.uk)

† This author leads the research.

## Table of Contents

|                       |    |
|-----------------------|----|
| FIGURES .....         | S3 |
| TABLES .....          | S6 |
| NOTES TO FIGURES..... | S7 |
| REFERENCES .....      | S8 |

## FIGURES

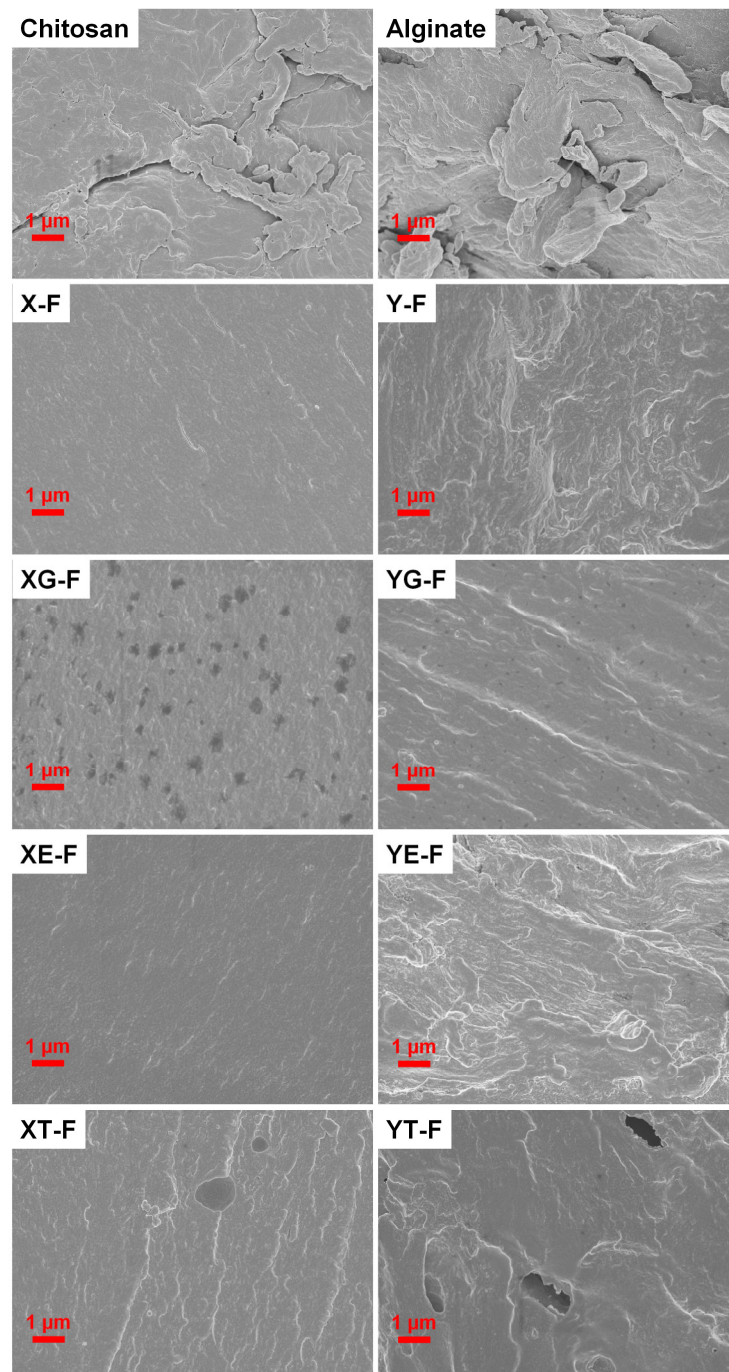

**Figure S1.** a) SEM images of cryo-fractured surfaces of the different biopolymer films.

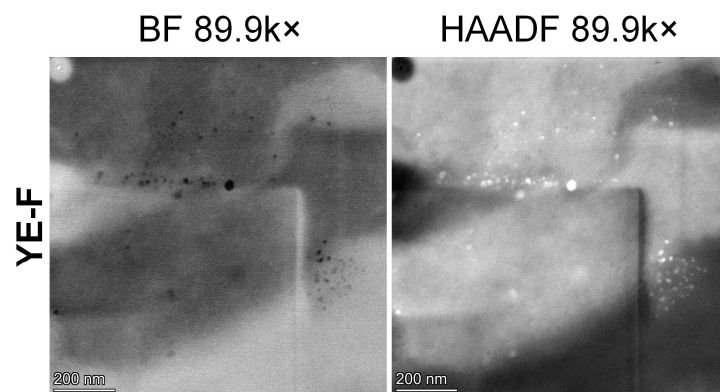

**Figure S2.** a) STEM images of YE-F. The “new structure” formed during STEM imaging are the black areas in the BF image or white areas in the HAADF image.

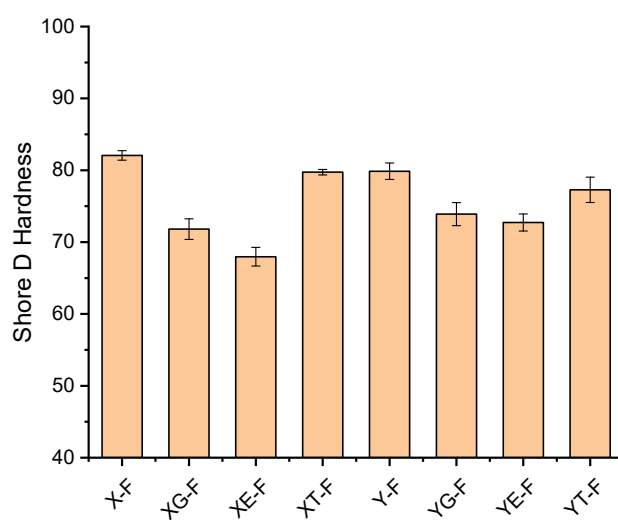

**Figure S3.** Shore D hardness of the different biopolymer films. Error bars represent standard deviations.

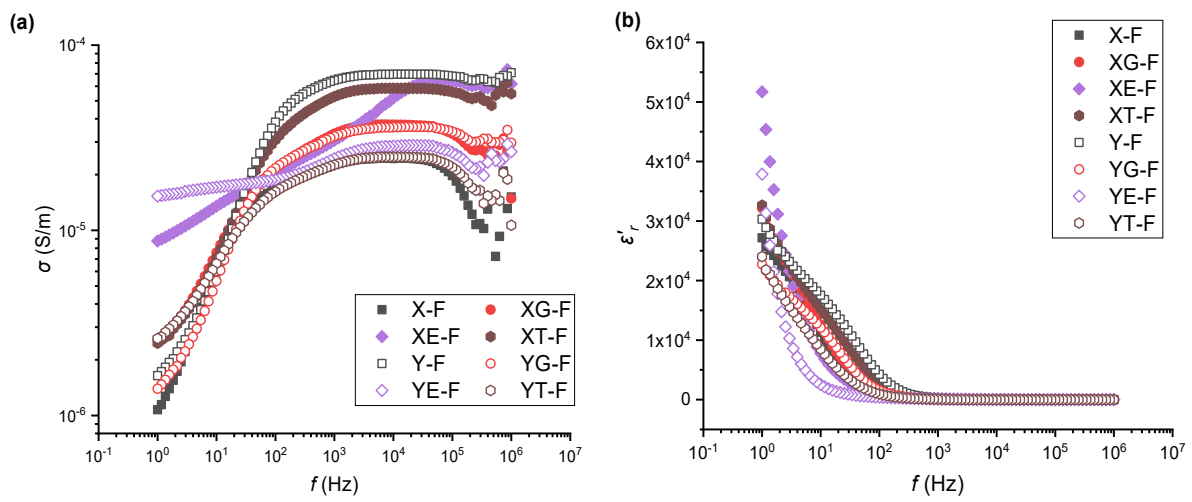

**Figure S4.** EIS results for the different biopolymer films: a) AC conductivity ( $\sigma$ ); and b) real relative permittivity ( $\epsilon'_r$ ).

## TABLES

**Table S1.** Bulk resistance ( $R_b$ ) and ionic conductivity ( $\sigma_{dc}$ ) calculated from the Nyquist plots of impedance, and real relative permittivity ( $\epsilon'_r$ ) at 1 kHz, of the different biopolymer films at RT.

| Sample | $R_b$ ( $\times 10^4$ , $\Omega$ ) | $\sigma_{dc}$ ( $10^{-5}$ , $S \cdot m^{-1}$ ) | $\epsilon'_r$ at 1 kHz |
|--------|------------------------------------|------------------------------------------------|------------------------|
| X-F    | 6.10 $\pm$ 0.22                    | 2.41 $\pm$ 0.05                                | 69 $\pm$ 29            |
| XG-F   | 3.57 $\pm$ 0.60                    | 3.93 $\pm$ 0.70                                | 130 $\pm$ 27           |
| XE-F   | 2.23 $\pm$ 0.27                    | 6.85 $\pm$ 0.78                                | 208 $\pm$ 22           |
| XT-F   | 2.02 $\pm$ 0.24                    | 6.21 $\pm$ 0.78                                | 182 $\pm$ 34           |
| Y-F    | 1.84 $\pm$ 0.29                    | 6.63 $\pm$ 0.97                                | 183 $\pm$ 38           |
| YG-F   | 2.80 $\pm$ 0.31                    | 3.65 $\pm$ 0.41                                | 103 $\pm$ 43           |
| YE-F   | 3.97 $\pm$ 0.30                    | 2.74 $\pm$ 0.20                                | 66 $\pm$ 13            |
| XT-F   | 5.21 $\pm$ 2.30                    | 2.29 $\pm$ 0.94                                | 64 $\pm$ 37            |

## NOTES TO FIGURES

In **Figure 3** (FTIR), chitosan displayed characteristic reflections at  $1649\text{ cm}^{-1}$  (amide I),  $1591\text{ cm}^{-1}$  (N—H bending from amine and amide II),  $1420\text{ cm}^{-1}$  (vibration of O—H in the ring),  $1375\text{ cm}^{-1}$  ( $\text{CH}_3$  symmetrical deformation mode),  $1319\text{ cm}^{-1}$  (vibration of C—H in the ring),  $1265\text{ cm}^{-1}$  (amide III),  $1190\text{--}920\text{ cm}^{-1}$  (C—N stretching),  $1150\text{--}1040\text{ cm}^{-1}$  (asymmetric C—O—C stretching in the glycosidic linkage), and  $1024\text{ cm}^{-1}$  (skeletal vibration of C—O stretching).<sup>1-3</sup> Alginate sodium exhibited peaks at  $1591\text{ cm}^{-1}$  (asymmetric  $\text{COO}^-$  stretching),  $1408\text{ cm}^{-1}$  (symmetric  $\text{COO}^-$  stretching),  $1300\text{ cm}^{-1}$  (skeletal vibration of C—CH and O—CH bending),  $1082\text{ cm}^{-1}$  (asymmetric C—O—C stretching in the glycosidic linkage), and  $1024\text{ cm}^{-1}$  (skeletal vibration of C—O stretching).<sup>1,4</sup>

In **Figure 4** (XRD), within the  $2\theta$  range examined, chitosan displayed two strong peaks as reported previously.<sup>5-6</sup> The peak at  $13.2^\circ 2\theta$  ((020) reflection,  $d$ -spacing = 0.78 nm) is assigned to hydrated crystals due to the integration of water molecules in the crystal lattice and the peak located at  $23.3^\circ 2\theta$  ((100) reflection,  $d$ -spacing = 0.44 nm) is attributed to the regular crystal lattice of chitosan.<sup>7</sup> Alginate exhibited two broad XRD peaks as observed previously.<sup>8-9</sup> The peak at  $15.9^\circ$  ( $d$ -spacing = 0.65 nm) is due to the (110) plane from the poly(guluronate) unit and the one at  $25.1^\circ$  ( $d$ -spacing = 0.41 nm) due to the (200) plane from the poly(mannuronate) unit.<sup>10-11</sup>

**Figure S4(a)** shows that for all the biopolymer films, AC conductivity ( $\sigma$ ) increased with frequency ( $f$ ), which is typical of an insulating material (dielectric). Nonetheless, XE-F and YE-F had higher  $\sigma$  values at low  $f$  ( $< 30\text{ Hz}$ ) than the other samples. In this regard, with  $[\text{C}_2\text{mim}][\text{OAc}]$ , it could be that more mobile ions in the bulk material contribute towards conductivity especially at low  $f$ .<sup>12</sup> **Figure S4(b)** shows that the real relative permittivity ( $\epsilon'_r$ ) of all samples increased abruptly with decreasing  $f$ , which could be associated with electrode polarization and space charge

effects (dipole moment).<sup>13-14</sup> For XE-F and YE-F,  $\varepsilon_r'$  increased more sharply with decreasing  $f$ . In these samples, the mobile ions could be contributed by [C<sub>2</sub>mim][OAc].

## REFERENCES

- (1) Lawrie, G.; Keen, I.; Drew, B.; Chandler-Temple, A.; Rintoul, L.; Fredericks, P.; Grøndahl, L. Interactions between Alginate and Chitosan Biopolymers Characterized Using FTIR and XPS. *Biomacromolecules* **2007**, 8 (8), 2533-2541, DOI: 10.1021/bm070014y.
- (2) Pawlak, A.; Mucha, M. Thermogravimetric and FTIR Studies of Chitosan Blends. *Thermochim. Acta* **2003**, 396 (1-2), 153-166, DOI: 10.1016/s0040-6031(02)00523-3.
- (3) Chen, Z.; Mo, X.; He, C.; Wang, H. Intermolecular Interactions in Electrospun Collagen–Chitosan Complex Nanofibers. *Carbohydr. Polym.* **2008**, 72 (3), 410-418, DOI: 10.1016/j.carbpol.2007.09.018.
- (4) Papageorgiou, S. K.; Kouvelos, E. P.; Favvas, E. P.; Sapalidis, A. A.; Romanos, G. E.; Katsaros, F. K. Metal–Carboxylate Interactions in Metal–Alginate Complexes Studied with FTIR Spectroscopy. *Carbohydr. Res.* **2010**, 345 (4), 469-473, DOI: 10.1016/j.carres.2009.12.010.
- (5) Epure, V.; Griffon, M.; Pollet, E.; Avérous, L. Structure and Properties of Glycerol-Plasticized Chitosan Obtained by Mechanical Kneading. *Carbohydr. Polym.* **2011**, 83 (2), 947-952, DOI: 10.1016/j.carbpol.2010.09.003.
- (6) Matet, M.; Heuzey, M.-C.; Pollet, E.; Ajji, A.; Avérous, L. Innovative Thermoplastic Chitosan Obtained by Thermo-Mechanical Mixing with Polyol Plasticizers. *Carbohydr. Polym.* **2013**, 95 (1), 241-251, DOI: 10.1016/j.carbpol.2013.02.052.



- (7) Kittur, F. S.; Vishu Kumar, A. B.; Tharanathan, R. N. Low Molecular Weight Chitosans—Preparation by Depolymerization with *Aspergillus Niger* Pectinase, and Characterization. *Carbohydr. Res.* **2003**, *338* (12), 1283-1290, DOI: 10.1016/s0008-6215(03)00175-7.
- (8) Gao, C.; Pollet, E.; Avérous, L. Properties of Glycerol-Plasticized Alginate Films Obtained by Thermo-Mechanical Mixing. *Food Hydrocolloids* **2017**, *63*, 414-420, DOI: 10.1016/j.foodhyd.2016.09.023.
- (9) Gao, C.; Pollet, E.; Avérous, L. Innovative Plasticized Alginate Obtained by Thermo-Mechanical Mixing: Effect of Different Biobased Polyols Systems. *Carbohydr. Polym.* **2017**, *157*, 669-676, DOI: 10.1016/j.carbpol.2016.10.037.
- (10) Sikorski, P.; Mo, F.; Skjåk-Bræk, G.; Stokke, B. T. Evidence for Egg-Box-Compatible Interactions in Calcium–Alginate Gels from Fiber X-ray Diffraction. *Biomacromolecules* **2007**, *8* (7), 2098-2103, DOI: 10.1021/bm0701503.
- (11) Fabia, J.; Ślusarczyk, C.; Gawłowski, A. Supramolecular Structure of Alginate Fibres for Medical Applications Studied by Means of WAXS and SAXS Methods. *Fibres and Textiles in Eastern Europe* **2005**, *13* (5), 114-117.
- (12) Osman, Z.; Ibrahim, Z. A.; Arof, A. K. Conductivity Enhancement due to Ion Dissociation in Plasticized Chitosan Based Polymer Electrolytes. *Carbohydr. Polym.* **2001**, *44* (2), 167-173, DOI: 10.1016/S0144-8617(00)00236-8.
- (13) Khair, A. S. A.; Puteh, R.; Arof, A. K. Conductivity Studies of a Chitosan-Based Polymer Electrolyte. *Physica B* **2006**, *373* (1), 23-27, DOI: 10.1016/j.physb.2005.10.104.
- (14) Navaratnam, S.; Ramesh, K.; Ramesh, S.; Sanusi, A.; Basirun, W. J.; Arof, A. K. Transport Mechanism Studies of Chitosan Electrolyte Systems. *Electrochim. Acta* **2015**, *175*, 68-73, DOI: 10.1016/j.electacta.2015.01.087.
